# Supplementary material
Source: PubMed Central journal article supplement (PMC3061025)
Supplement: emboj201114s1.pdf [file emboj201114s1.pdf]

FigS1

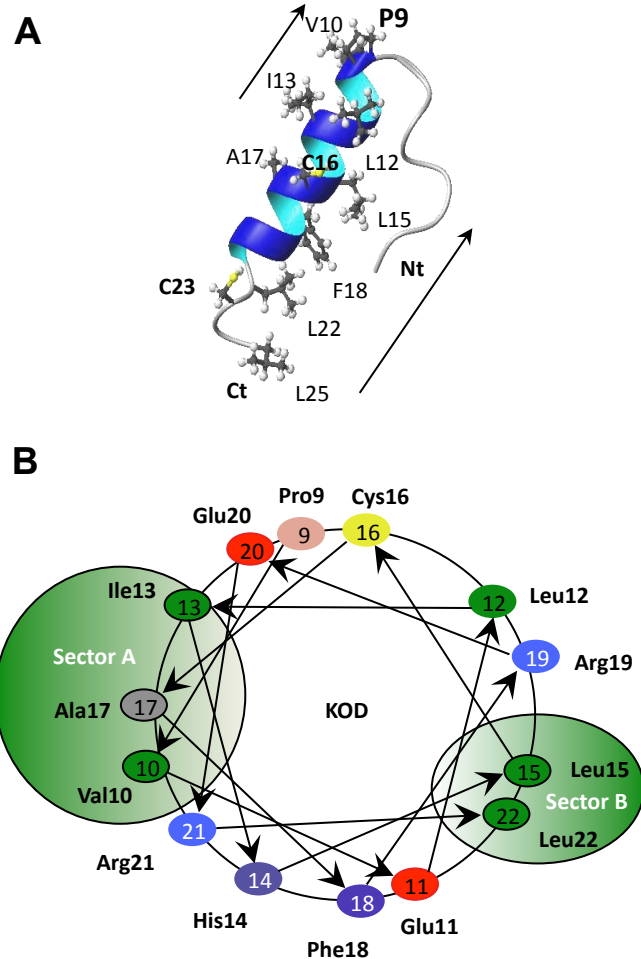

**Fig. S1. A) Model of the alpha-helix based on NMR data**, with two hydrophobic ridges of 6 residues (P9, V10, L12, I13, C16, A17) and 4 residues (L15, F18, L22, L25). **B) Helical wheel representation of the carboxy-terminal segment of KOD (aa 9-22)**. Pro-9 was not excluded to indicate the anchor amino acid of the alpha-helix (aa 10-22). The representation reveals the organization of highly hydrophobic amino acids in two opposite sectors (sector A and sector B) framed by polar amino acids of opposite charges. The amphiphilic nature of this helix and the symmetric distribution of charges may have a functional relevance. RasMol amino acid color code.

**FigS2**

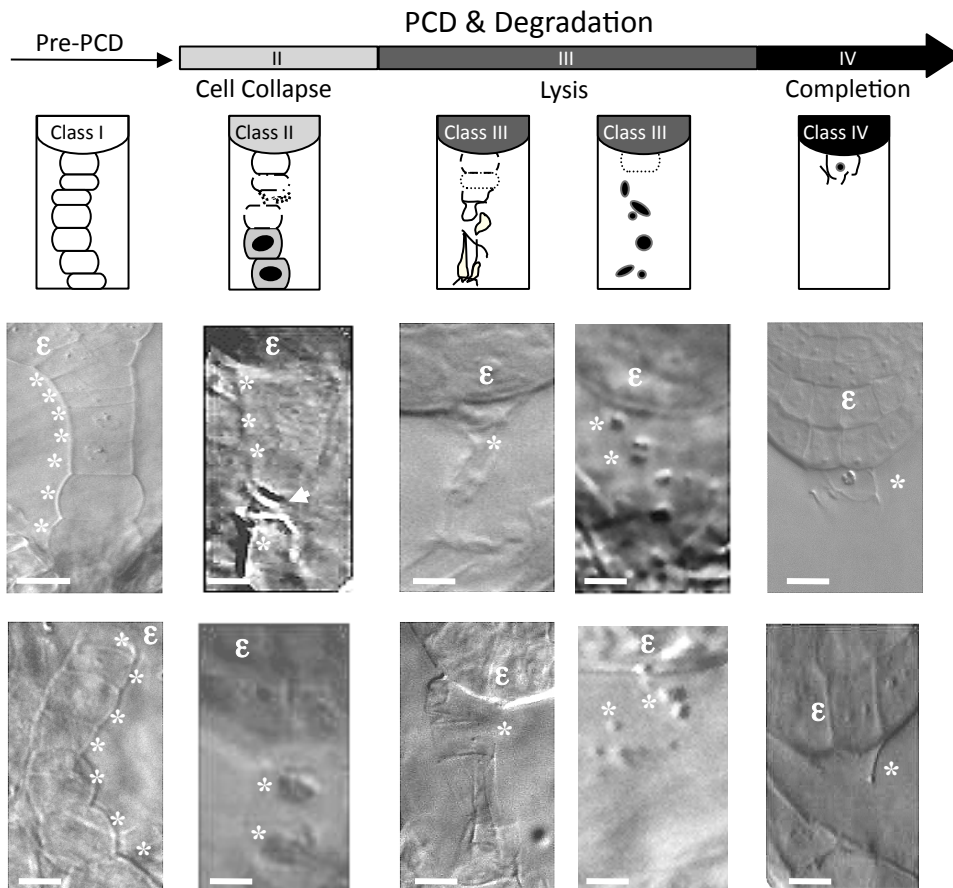

**Fig. S2. PCD stages of *Arabidopsis Col-0* suspensors at the bent-cotyledon embryo stage.**  $\epsilon$ , embryo proper; \*, suspensor cells; arrowheads point to breaks in the suspensor cell file.

FigS3

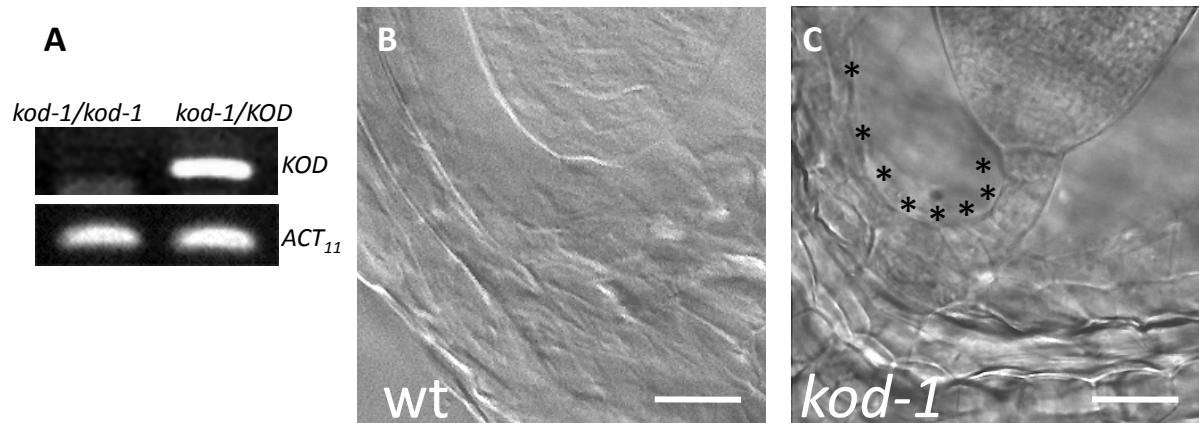

**Fig. S3. *KOD* expression in the *kod-1* background.** (A) *KOD* transcript level in cDNA from green siliques using a 3'RACE approach to prevent amplification of genomic DNA. ACTIN11 (ACT<sub>11</sub>) is used as reference gene as it is the actin family member most expressed in embryos. Expression of *KOD* was only detected in heterozygotes and WT plants. The data presented is for an heterozygote plant. (B-C) DIC images of representative suspensors at the bent-cotyledon stage in WT and *kod-1* seeds. Bars equal 10  $\mu$ m.

FigS4

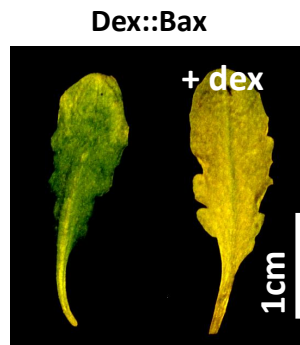

**Fig. S4. Bax-induced PCD in detached leaves.** Representative leaves of the dex-Bax line after 3 days of induction by dex. Individual leaves were kept in 1.5mL Eppendorf tubes with their petioles submerged in 30 $\mu$ M dex, in continuous light.

**Supplementary table 1: primers used in the study**

| <b>Primer</b>            | <b>Sequence 5'&gt; 3'</b>                                                            |
|--------------------------|--------------------------------------------------------------------------------------|
| GUS1                     | TGGACTGGCATGAACTTCGG                                                                 |
| GUS3                     | GTTGTCTAAGCGTCAATTG                                                                  |
| oGUSJ                    | TCACGGGTTGGGTTTCTAC                                                                  |
| oSUPR                    | TACTTAGAGATGACAGAGACG                                                                |
| oexTi15 (K)              | ATCAGTCACAGTCAAATTCGA                                                                |
| oTi05 (L)                | CGTCTTCGAGAAAAGTGTAG                                                                 |
| oSUPR1                   | GATGACAGAGACGCTCTCG                                                                  |
| act2.3                   | CAGCACCAATCGTGATGACTTGCCC                                                            |
| act2.5                   | GTTAGCAACTGGGATGATATGG                                                               |
| act11F                   | GGAACAGTGTGACTCACACCATC                                                              |
| act11R                   | AAGCTGTTCTTCCCT                                                                      |
| oxpo4                    | GTATGTCGTTGGCCAGTATCC                                                                |
| oxpo7                    | TCCCAGTGAAGTAGCAGCAC                                                                 |
| Spep5                    | TCGAGATGTGGTGGCTAGTTGGACTTAGACCAGTTGAGTTGATCCATC<br>TT                               |
| Spep3                    | AAGATGGATCAACTCAACTGGTCTAAGTCCAAC TAGCCACCACATC                                      |
| pep5                     | TCGAGATGTGGTGGCTAGTTGGACTTAGACCAGTTGAGTTGATCCATC<br>TTTGCGCATTTCGAGAGCGTCTCTGTCATCTC |
| pep3                     | GAGATGACAGAGAGACGCTCTCGAAATGCGCAAAGATGGATCAACTCA<br>ACTGGTCTAAGTCCAAC TAGCCACCACATC  |
| Race-anchor              | GGCCACGCGTCGACTAGTAC                                                                 |
| Race-3                   | GGCCACGCGTCGACTAGTACTTTTTTTTTTTTTTTTTT                                               |
| 18S-29F                  | GGTCTGTGATGCCCTTAGATGTT                                                              |
| 18S-102R                 | GGCAAGGTGTGAACTCGTTGA                                                                |
| 18S-58T (Taqman probe)   | CGCACGCGCTACACTGATGT                                                                 |
| KOD-267F                 | TATGTGGTGGCTAGTTGGACTTACA                                                            |
| KOD-353R                 | AGCTTACTTAGAGATGACAGAGACGCT                                                          |
| KOD-293T (Taqman probe)  | CAGTTGAGTTGATCCATCTTTGCGATTTC                                                        |
| Act2-123F                | GAGAGATTCAGATGCCAGAAGTC                                                              |
| Act2-190R                | TGGATTCCAGCAGCTTCCA                                                                  |
| Act2-148T (Taqman probe) | TGTTCCAGCCCTCGTTTGTGGGA                                                              |
| KOD-ATG F                | ATGTGGTGGCTAGTTGG                                                                    |
